# Supplementary material for: The Anticancer Activities of Some Nitrogen Donor Ligands Containing bis-Pyrazole, Bipyridine, and Phenanthroline Moiety Using Docking Methods
Source: Hindawi journal article supplement (doi:10.1155/2018/5796287), 2018-06-04
Supplement: f1 [file 5796287.f1.pdf]

**CA-II** **7** **11** **15**

**Cat B** **7** **11** **15**

**DNA-1** **7** **11** **15**

**DNA-2** **7** **11** **15**

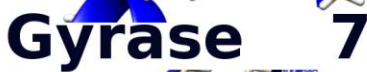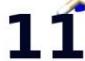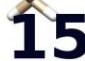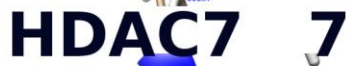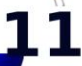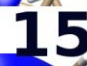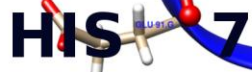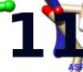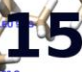



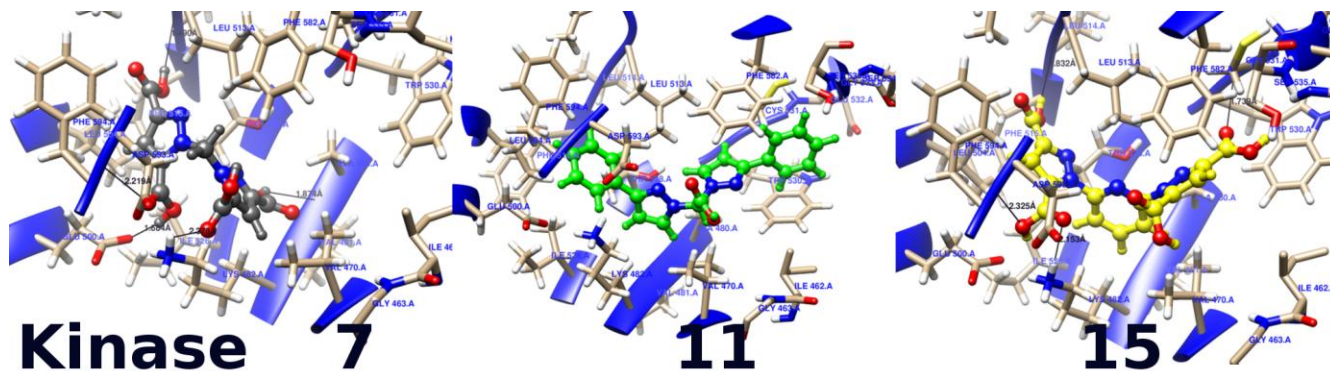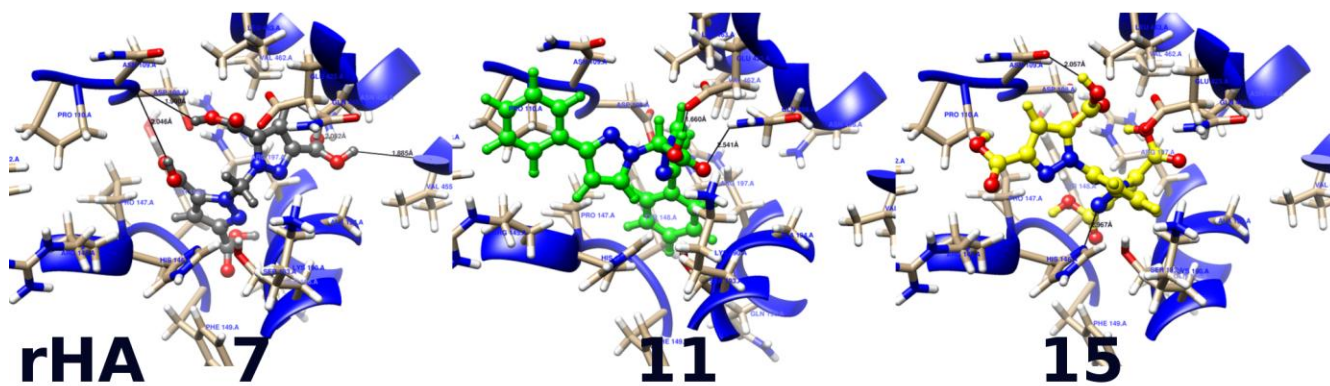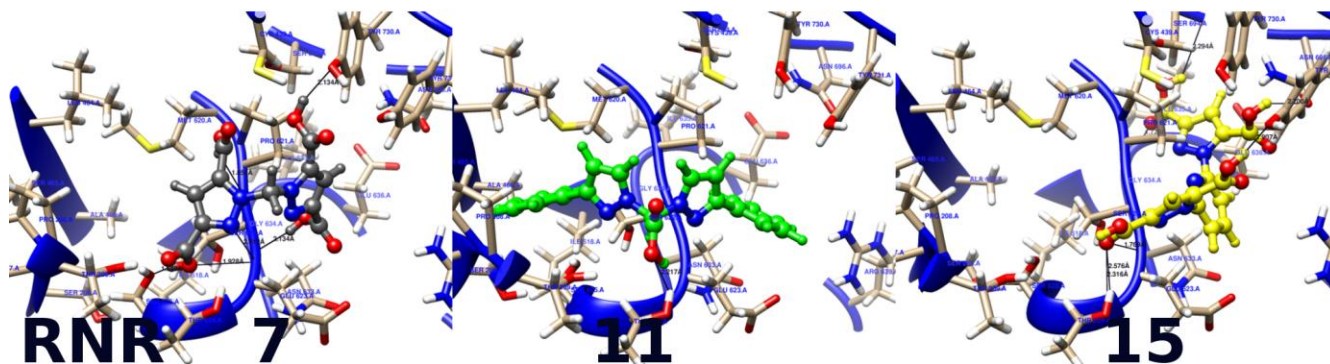

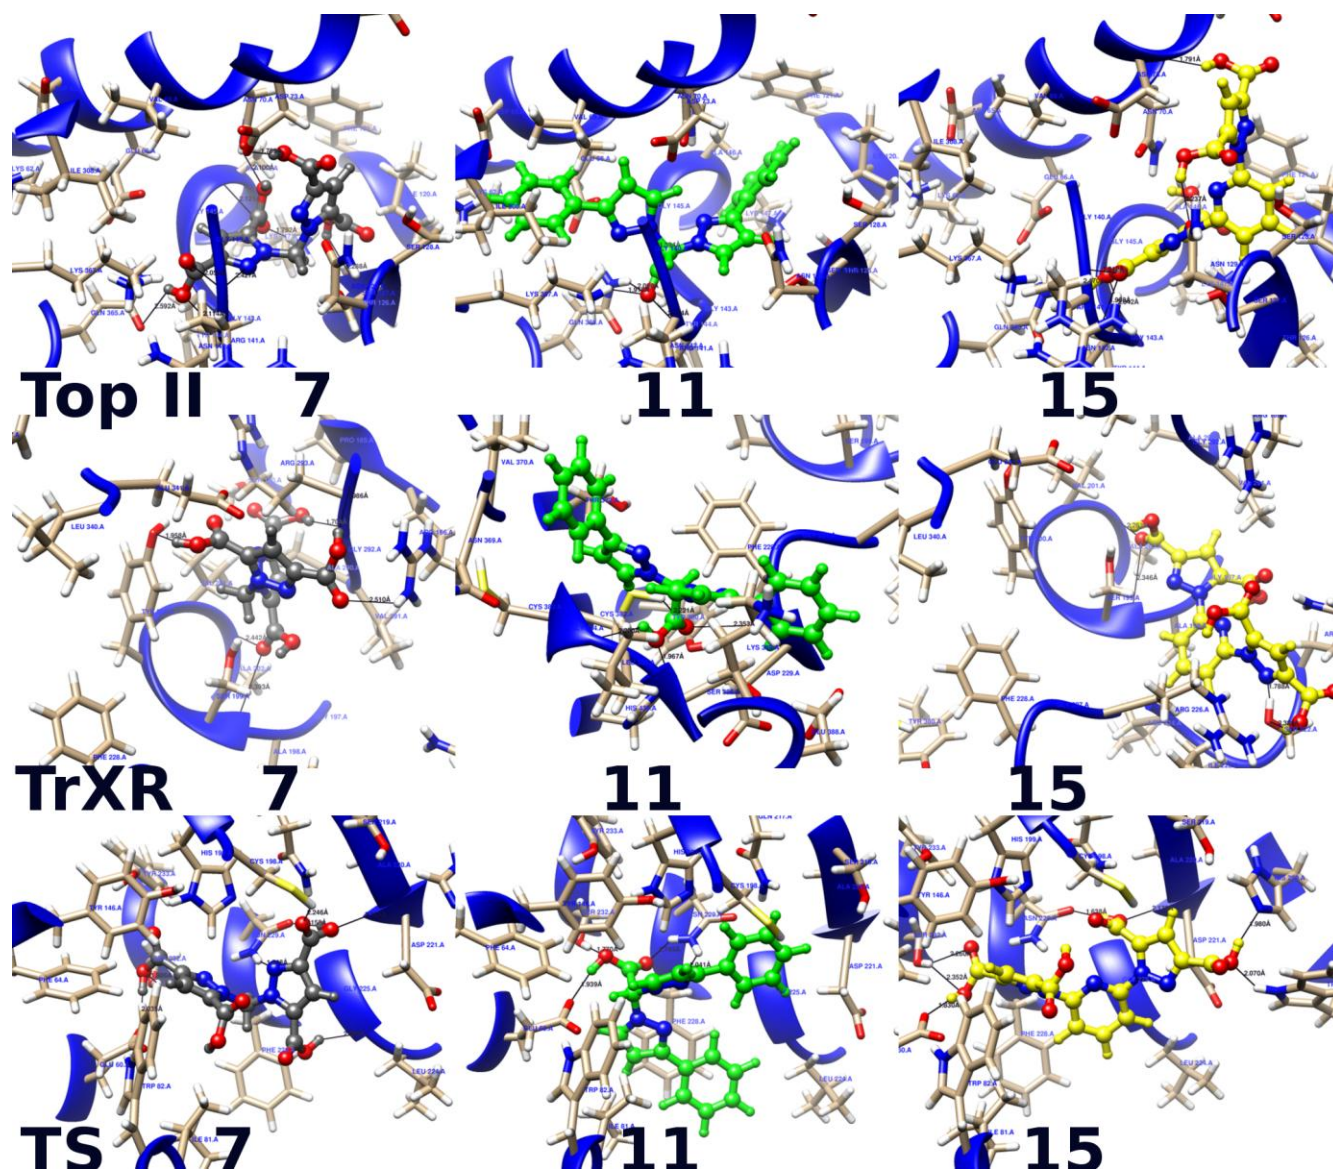

Figure S1: The binding site interaction of each of the three ligands 7 (grey), 11 (green) and 15 (yellow) (horizontally) with the receptors.
